# Supplementary material for: Identifying the effects of oxygen on the magnetism of WS2 nanosheets
Source: Royal Society of Chemistry journal article supplement (doi:10.1039/d2nr03778e), 2022-01-01
Supplement: d2nr03778e1.pdf [file d2nr03778e1.pdf]

## Supplementary information

### Identifying the effects of oxygen on the magnetism of WS<sub>2</sub> nanosheets

Yuanyuan Sun,<sup>\*a</sup> Hongjun Zhang,<sup>a</sup> Kaiyu Zhang,<sup>b</sup> Hongzhe Pan,<sup>a</sup> Yongping Zheng,<sup>c</sup> Qian Feng,<sup>c</sup> and  
Nujiang Tang<sup>d</sup>

<sup>a</sup> School of Physics and Electronic Engineering, Linyi University, Linyi 276000, China. E-mail:  
sunyuanyuan@lyu.edu.cn.

<sup>b</sup> Shanghai Advanced Research Institute, Chinese Academy of Sciences, Shanghai 201210, China.

<sup>c</sup> College of Physics and Energy, Fujian Normal University, Fujian Provincial Key Laboratory of  
Quantum Manipulation and New Energy Materials, Fujian Normal University, Fuzhou 350117,  
China.

<sup>d</sup> National Laboratory of Solid State Microstructures, Collaborative Innovation Center of  
Advanced Microstructures, Jiangsu Provincial Key Laboratory for Nanotechnology, Nanjing  
University, Nanjing 210093, China.

Corresponding Author

\*E-mail: [sunyuanyuan@lyu.edu.cn](mailto:sunyuanyuan@lyu.edu.cn)

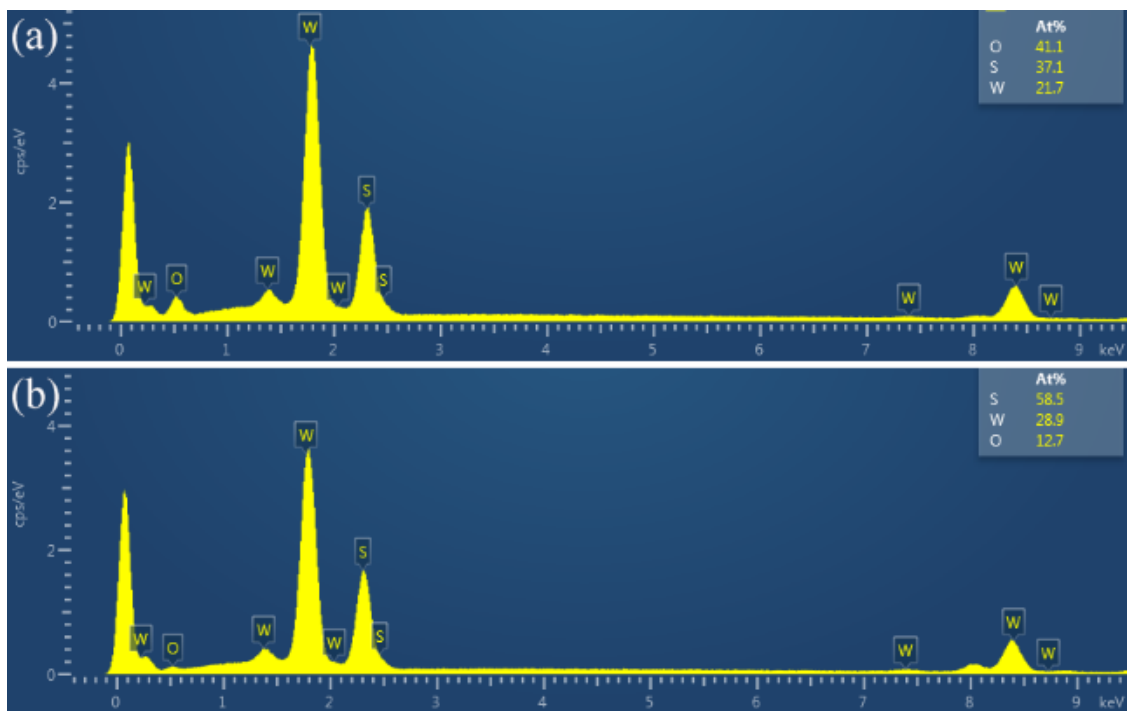

**Fig. S1.** (a) SEM-EDXS spectrum recorded on the exfoliated WS<sub>2</sub> nanosheets. (b) SEM-EDXS spectrum recorded on the sulfurized WS<sub>2</sub> nanosheets.

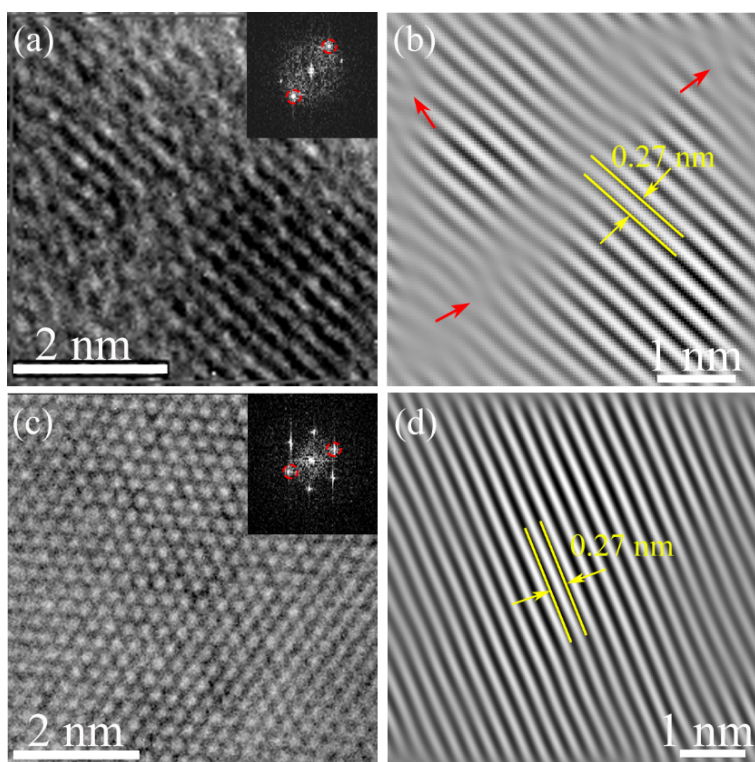

**Fig. S2.** (a) HRTEM image of the exfoliated WS<sub>2</sub> nanosheets and the corresponding FFT (inset). (b)

the IFFT calculated from the FFT spots in the inset of panel (a). (c) HRTEM image of the sulfurized WS<sub>2</sub> nanosheets and the corresponding FFT (inset). (d) IFFT calculated from the FFT spots in the inset of panel (c).

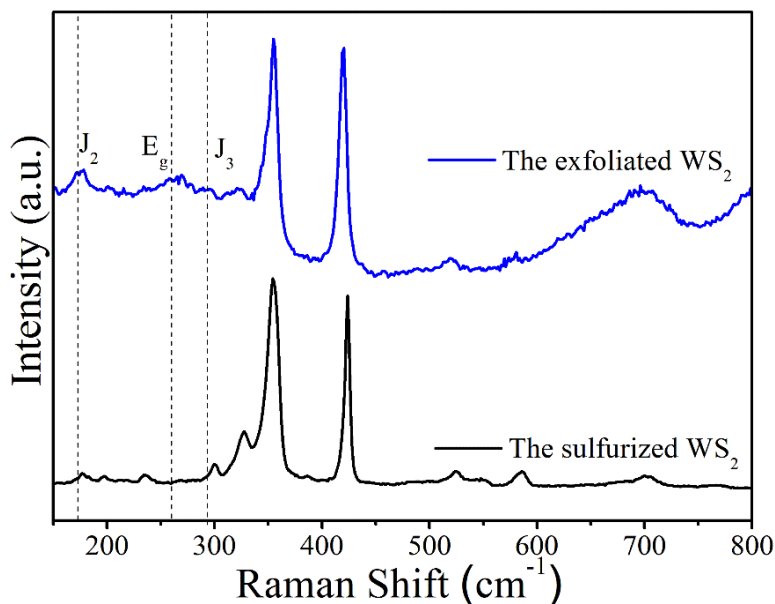

**Fig. S3.** The Raman spectra of the exfoliated and sulfurized WS<sub>2</sub> nanosheets.

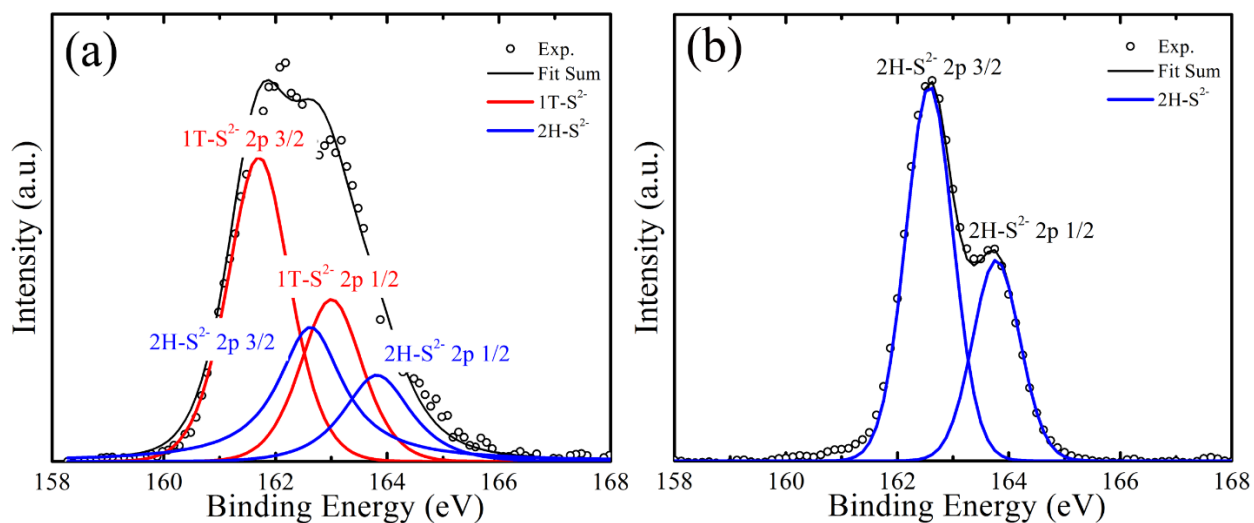

**Fig. S4.** (a) The typical fine-scanned S 2p spectrum of the exfoliated WS<sub>2</sub> nanosheets. The sub-peaks of 1T-S<sup>2-</sup> and 2H-S<sup>2-</sup> are denoted by red and blue lines, respectively. (b) The typical fine-scanned S 2p spectrum of the sulfurized WS<sub>2</sub> nanosheets.

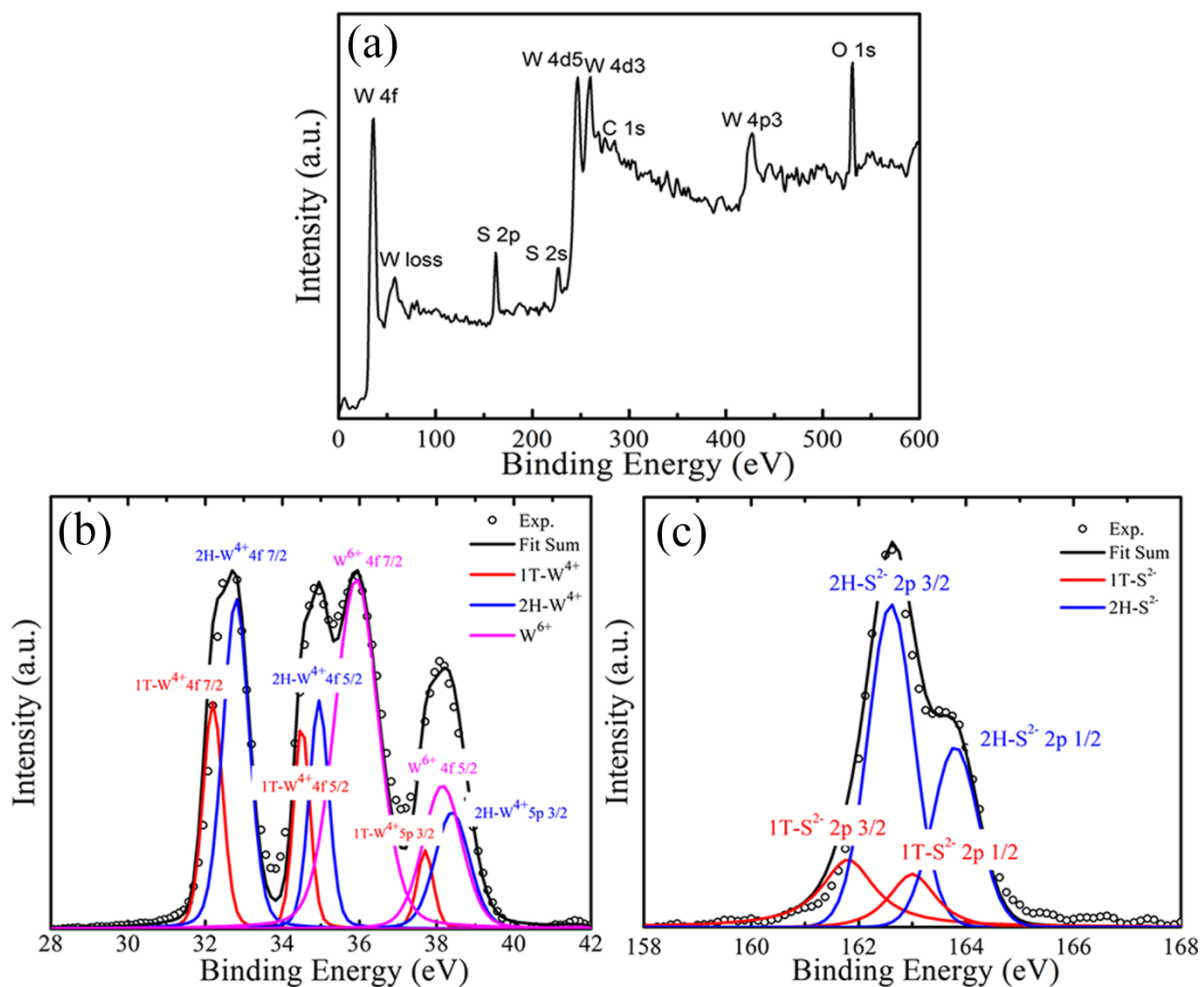

**Fig. S5.** (a) The XPS survey spectrum of the annealed WS<sub>2</sub> nanosheets. (b) The typical fine-scanned W 4f and 5p spectrum of the annealed WS<sub>2</sub> nanosheets. The sub-peaks of 1T-W<sup>4+</sup>, 2H-W<sup>4+</sup> and W<sup>6+</sup> are denoted by red, blue and magenta lines, respectively. (c) The typical fine-scanned S 2p spectrum of the annealed WS<sub>2</sub> nanosheets. The sub-peaks of 1T-S<sup>2-</sup> and 2H-S<sup>2-</sup> are denoted by red and blue lines, respectively.

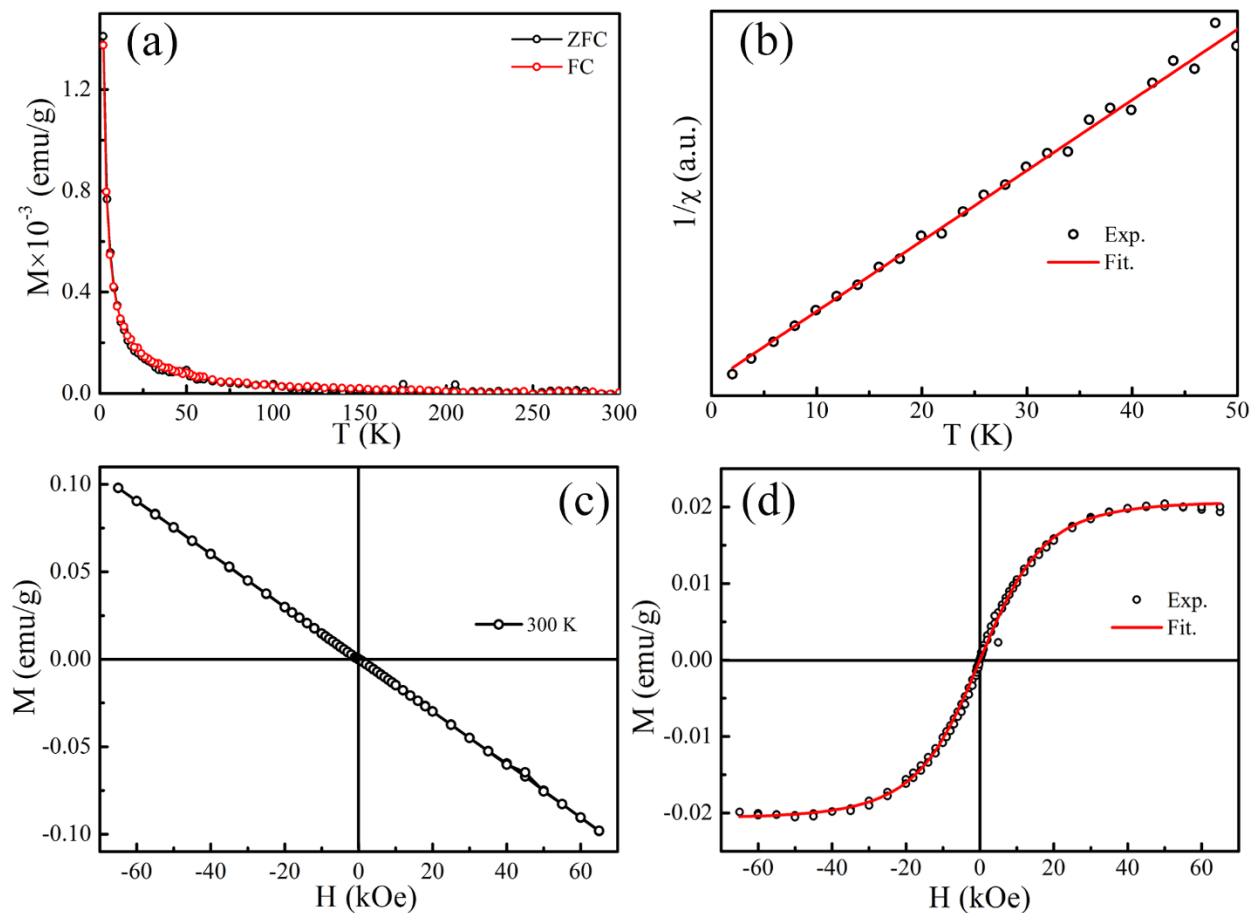

**Fig. S6.** The magnetic properties of the annealed WS<sub>2</sub> nanosheets. (a) ZFC and FC curves measured from 2 to 300 K under the applied field of 1 kOe. (b)  $1/\chi - T$  curve measured from 2 to 50 K. The black symbols are the measurements and the red line is fitted by the Curie law. (c) The  $M-H$  curve measured at 300 K. (d) The  $M-H$  curve measured at 2 K. The black symbols are the measurements and the red line is fitted by the Brillouin function.

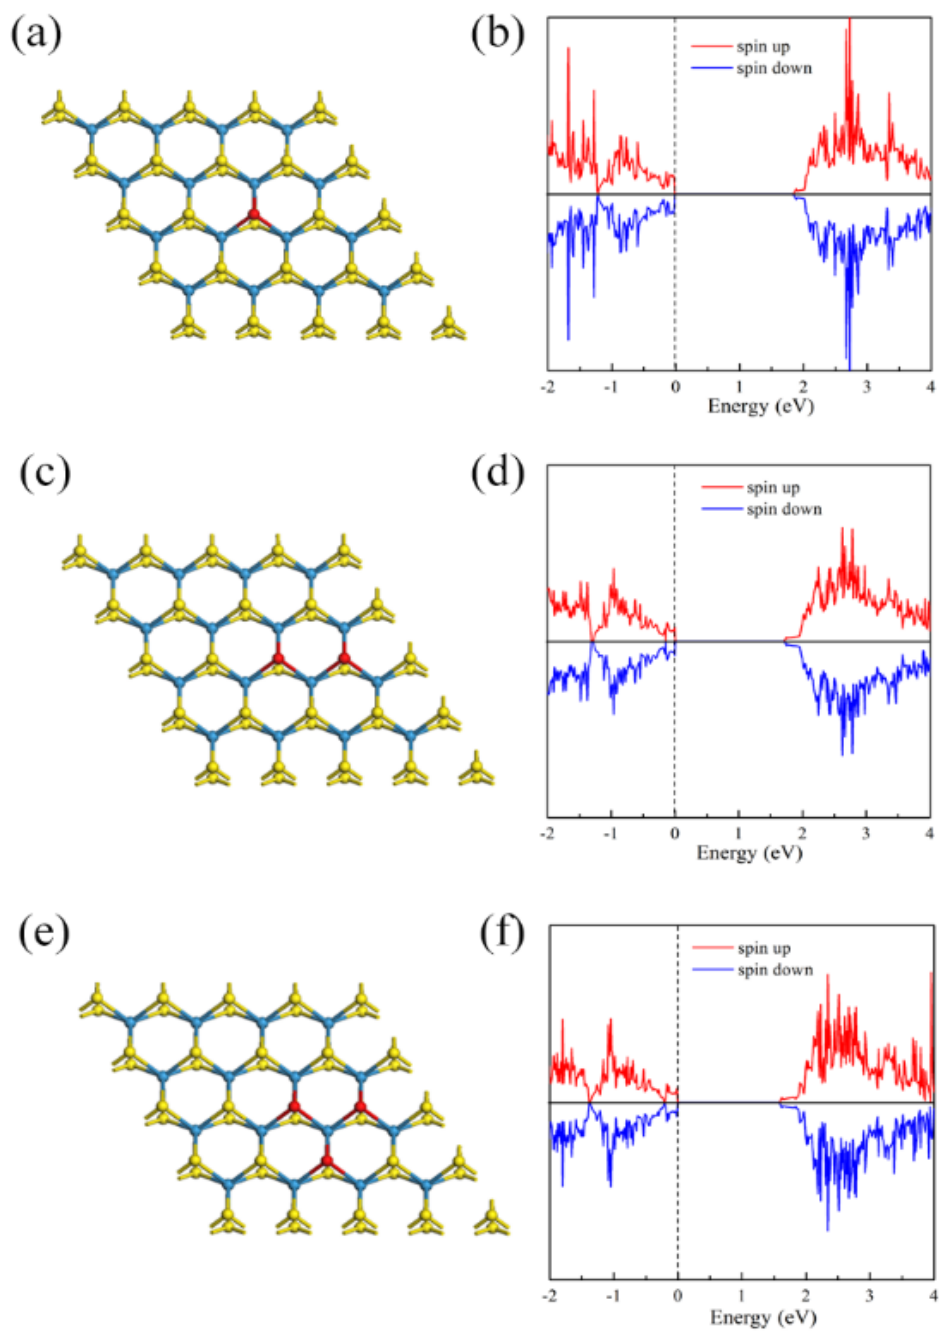

**Fig. S7.** (a) The structure and (b) the spin-polarized total DOS of WS<sub>2</sub> nanosheets with one sulfur atom substituted by oxygen. (c) The structure and (d) the spin-polarized total DOS of WS<sub>2</sub> nanosheets with two sulfur atoms substituted by oxygen. (e) The structure and (f) the spin-polarized total DOS of WS<sub>2</sub> nanosheets with three sulfur atoms substituted by oxygen.

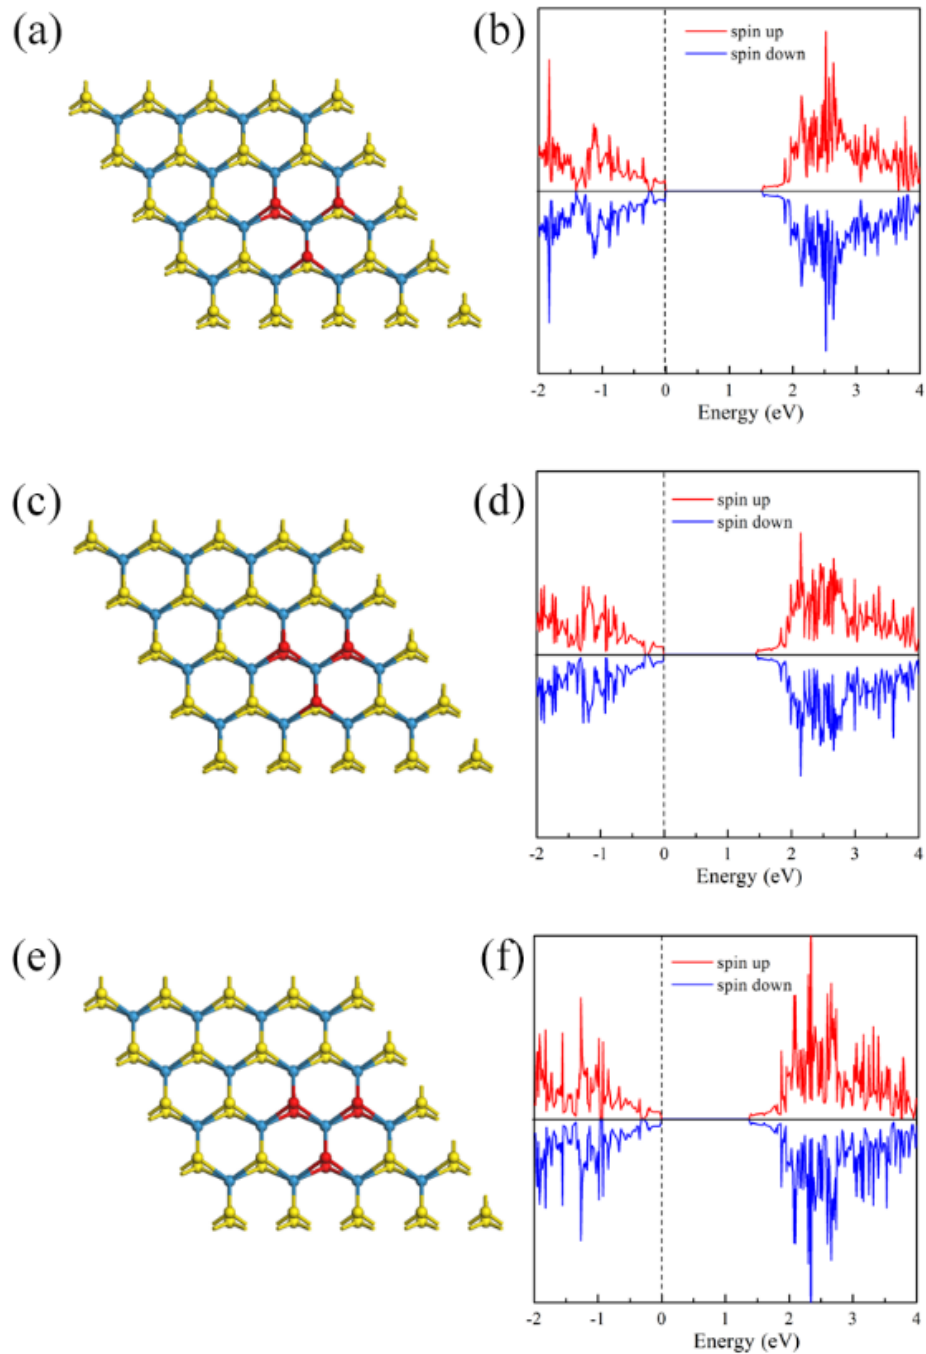

**Fig. S8.** (a) The structure and (b) the spin-polarized total DOS of WS<sub>2</sub> nanosheets with four sulfur atoms substituted by oxygen. (c) The structure and (d) the spin-polarized total DOS of WS<sub>2</sub> nanosheets with five sulfur atoms substituted by oxygen. (e) The structure and (f) the spin-polarized total DOS of WS<sub>2</sub> nanosheets with six sulfur atoms substituted by oxygen.

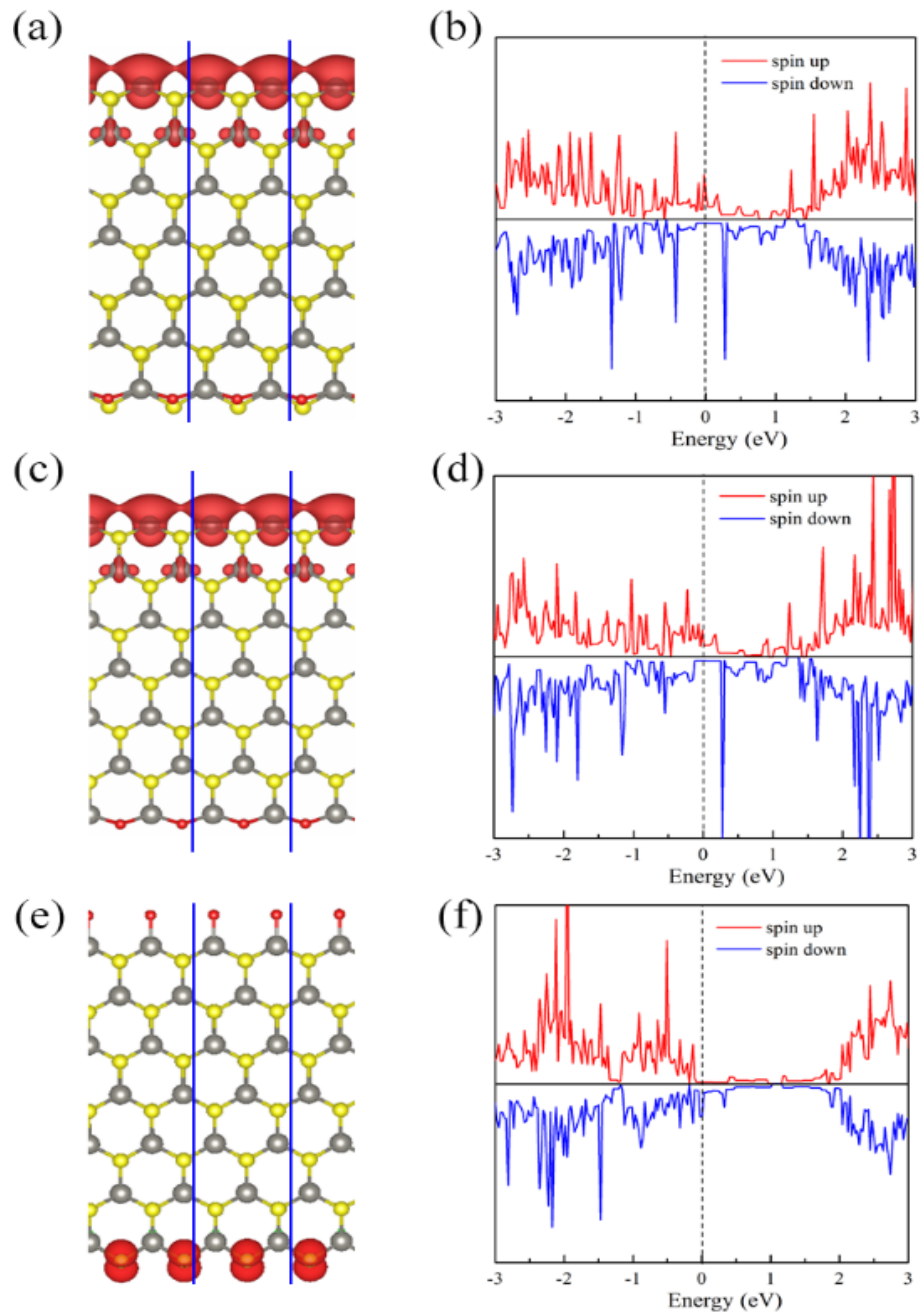

**Fig. S9.** (a) the net spin density distribution and (b) the spin-polarized DOS of WS<sub>2</sub>-ZNRs with one S atom at the edge substituted by oxygen (WS<sub>2</sub>-ZNRs-1Os). (c) the net spin density distribution and (d) the spin-polarized DOS of WS<sub>2</sub>-ZNRs with two S atoms at the edge substituted by oxygen (WS<sub>2</sub>-ZNRs-2Os). (e) the net spin density distribution and (f) the spin-polarized DOS of WS<sub>2</sub>-ZNRs with the edge W atoms bonding with oxygen (WS<sub>2</sub>-ZNRs-1O<sub>ad-w</sub>). The unit cells are depicted by the blue lines.



**Table S1** The magnetic moments ( $\mu_B$ ) of the unit cells for the single-layer WS<sub>2</sub> with sulfur atoms substituted by oxygen.

| sample        | 1O <sub>s</sub> | 2O <sub>s</sub> | 3O <sub>s</sub> | 4O <sub>s</sub> | 5O <sub>s</sub> | 6O <sub>s</sub> |
|---------------|-----------------|-----------------|-----------------|-----------------|-----------------|-----------------|
| M ( $\mu_B$ ) | 0.001           | 0               | 0.003           | 0.003           | 0.003           | 0               |
